# Supplementary material for: Neurological Immune Related Adverse Events Associated with Nivolumab, Ipilimumab, and Pembrolizumab Therapy—Review of the Literature and Future Outlook
Source: PubMed Central journal article supplement (PMC6912719; doi:10.3390/jcm8111777), 2019-10-24
Supplement: jcm-08-01777-s001.pdf [file jcm-08-01777-s001.pdf]

**Table S1.** Overview of published case-reports regarding central nervous system manifestations as neurological adverse events of ICI-therapy. Besides patients' clinical data certain diagnostic findings as well as immunosuppressive.

| author              | year | patient age | patient sex | underlying disease                       | ICI therapy                | neurological symptoms                                                              | latency ICI-start/onset irAE | CSF findings                                          | brain MRI                   | antibody findings                 | immunosppr. therapy               | outcome                         | others                                                     |
|---------------------|------|-------------|-------------|------------------------------------------|----------------------------|------------------------------------------------------------------------------------|------------------------------|-------------------------------------------------------|-----------------------------|-----------------------------------|-----------------------------------|---------------------------------|------------------------------------------------------------|
| Bossart et al [1]   | 2017 | 60          | female      | metastatic melanoma, cerebral metastases | ipilimumab + pembrolizumab | <b>encephalitis</b> (generalized weakness, tiredness)                              | 12 weeks                     | n.d.                                                  | inconspicuous               | n.d.                              | n.d.                              | death                           | autopsy: infiltrates of CD8+ lymphocytes esp. In brainstem |
| Burke et al [2]     | 2018 | 64          | female      | clera-cell ovarian cancer                | nivolumab                  | <b>encephalitis</b> (fever, spasms, delirium)                                      | 17 weeks                     | n.d.                                                  | inconspicuous               | GAD-antibody positive             | methylpredn. i.v., plasmapheresis | major improvement               |                                                            |
| Maurice et al [3]   | 2015 | 60          | male        | metastatic melanoma                      | ipilimumab + nivolumab     | <b>encephalitis</b> (subacute confusion, nausea, vomiting, psychomotor slowing)    | 8 weeks                      | cc 0, protein 0.88 g/l, myelin-basic protein positive | tumefactive demyelination   | n.d.                              | methylpredn. i.v., IVIG           | improvement                     | CD4+ and CD8+ T-cell infiltration of spinal cord           |
| Richard et al [4]   | 2017 | 74          | male        | NSCLC                                    | nivolumab                  | <b>encephalitis</b> (dysarthria, weakness of lower limbs)                          | 1 week                       | inconspicuous                                         | n.d.                        | negative                          | methylpredn. i.v.                 | improvement                     |                                                            |
| Schneider et al [5] | 2017 | 78          | male        | squamous cell carcinoma lung             | nivolumab                  | <b>encephalitis</b> (apathy, aphasia, myoclonuses)                                 | 28 weeks                     | cc 16, lactate 4.1 mol/l, protein 1.03 g/l            | inconspicuous               | negative                          | methylpredn. i.v.                 | major improvement               |                                                            |
| Williams et al [6]  | 2016 | 55          | female      | metastatic melanoma, cerebral metastases | nivolumab + ipilimumab     | <b>encephalitis</b> (memory loss, gait disturbance, fever, inappropriate laughing) | 1 week                       | cc 8, glucose and protein normal                      | inconspicuous               | NMDA-R-antibodies positive in CSF | methylpredn. i.v., IVIG           | no improvement, after rituximab |                                                            |
|                     |      | 65          | male        | SCLC                                     | nivolumab + ipilimumab     | <b>encephalitis</b> (short-term memory loss,                                       | 4 days                       | cc 18, protein 0.98 g/l                               | nonspecific T2 hyperintense | antigliab nuclear antibody        | prednisone 60 mg/d                | dramatic improvement            |                                                            |

|                           |      |    |        |                                           |                        |                                                                                                        |          |                          |                                                                                         |                |                                                                               |                            |                                     |
|---------------------------|------|----|--------|-------------------------------------------|------------------------|--------------------------------------------------------------------------------------------------------|----------|--------------------------|-----------------------------------------------------------------------------------------|----------------|-------------------------------------------------------------------------------|----------------------------|-------------------------------------|
|                           |      |    |        |                                           | b                      | progressive gait disturbance)                                                                          |          |                          | se lesion right mesial ltemporal lobe                                                   | (SOX-1), serum |                                                                               |                            |                                     |
| <b>Kawamura et al [7]</b> | 2016 | 54 | female | adeno-carcinoma lung, cerebral metastases | nivolumab              | <b>cerebellitis</b> (dizziness, nausea, nystagmus, cerebellar ataxia)                                  | 2 weeks  | cc 10, protein 0.56 g/l  | inconspicuous                                                                           | negative       | methylpredn. 1g/d, 3 days                                                     | major improvement          | patient died due to pneumonia       |
| <b>Narumi et al [8]</b>   | 2018 | 75 | male   | squamous cell carcinoma lung              | nivolumab              | <b>NMOSD</b> (acute bilateral paralysis, sensory loss below Th10)                                      | 8 weeks  | cc 1195, protein 3.8 g/l | brain MRI: inconspicuous; <b>spinal:</b> T2 hyperintense lesions C5-6, Th12-L1          | AQP4, serum    | methylpredn. i.v., plasmapheresis                                             | minimal improvement        |                                     |
| <b>O'Kane et al [9]</b>   | 2014 | 58 | male   | metastatic melanoma                       | ipilimumab             | <b>Myelitis</b> (weakness left leg, sensory deficit below Th10, constipation, micturition disturbance) | 24 weeks | cc 16, protein 0.57 g/l  | brain MRI: inconspicuous; <b>spinal:</b> T2 hyperintense lesion Th7-L1                  | negative       | methylpredn. i.v., IVIG 5 days                                                | little improvement         | colitis, day 16 after therapy start |
| <b>Tan et al [10]</b>     | 2018 | 65 | male   | metastatic melanoma                       | nivolumab + ipilimumab | <b>neurosarcoidosis</b> (transient aphasia, visual field defects, mental status deficits)              | 52 weeks | cc 13, protein 0.75 g/l  | leptomeningeal enhancement left occipital and parietal lobes                            | n.d.           | methylpredn. i.v., dexamethasone 16 mg/d; infliximab 5mg/kg; MTX 12,5 mg/week | improvement                |                                     |
| <b>Salam et al [11]</b>   | 2016 | 64 | male   | metastatic melanoma                       | pembrolizumab          | <b>limbic encephalitis</b> (progressive decline in memory MMSE 22/30)                                  | 52 weeks | cc 17, protein 0.53 g/l  | bilateral symmetric T2 hyperintense, hippocampi, anterior temporal lobe, insula atrophy | negative       | methylpredn. i.v.                                                             | no improvement, no decline |                                     |
| <b>Stein et al [12]</b>   | 2015 | 56 | male   | metastatic melanoma                       | ipilimumab             | <b>meningoencephalitis</b> (diaphoresis,                                                               | 15 weeks | cc 705 (96%              | initially negative;                                                                     |                | methylpredn. i.v.                                                             | complete recovery          |                                     |

|                            |      |    |        |                     |                           |                                                                                                                                               |           |                                |                                                                                                                                                                             |      |                                                                |                    |
|----------------------------|------|----|--------|---------------------|---------------------------|-----------------------------------------------------------------------------------------------------------------------------------------------|-----------|--------------------------------|-----------------------------------------------------------------------------------------------------------------------------------------------------------------------------|------|----------------------------------------------------------------|--------------------|
|                            |      |    |        |                     |                           | fevers, declining mental status)                                                                                                              |           | lymphos)<br>protein<br>2.2 g/l | Repeat:<br>abnormal<br>diffuse<br>dural<br>thickening<br>with<br>enhanceme<br>nt                                                                                            |      | 160 mg/d                                                       |                    |
| <b>Khoja et al [13]</b>    | 2016 | 51 | female | metastatic melanoma | pembrolizumab             | <b>acute encephalopathy</b> and eosinophilic fasciitis (headache, visual field floaters, movement difficulty; thickened waxy skin; confusion) | 76 weeks  | cc normal, protein 0.27 g/l    | hyperintense white matter foci subcortical and periventricular, all with restricted diffusion new enhancing lesion centrum semiovale left; follow-up: two new lesions FLAIR | n.d. | methylpredn. i.v.                                              | slight improvement |
| <b>Gettings et al [14]</b> | 2015 | 56 | male   | metastatic melanoma | ipilimumab                | <b>MS relapse</b> (new gait dysfunction, ataxia)                                                                                              | 4 weeks   | n.d.                           | hyperintensity parasagittal, frontoparietal, temporal-occipital FLAIR                                                                                                       | n.d. | methylpredn. i.v. 500 mg 3 days; glatiramer acetate + steroids |                    |
| <b>LaPorte et al [15]</b>  | 2017 | 26 | female | Hodgkin's Lymphoma  | ipilimumab, pembrolizumab | <b>PRES</b> (grand mal seizure)                                                                                                               | 1.5 weeks | n.d.                           | hyperintense lesions posterior white-matter region: cerebellar,                                                                                                             | n.d. | none                                                           | improvement        |
| <b>Maur et al [16]</b>     | 2012 | 58 | female | metastatic melanoma | ipilimumab                | <b>PRES</b> (acute blindness, headache, generalized seizures)                                                                                 | 2 weeks   | n.d.                           |                                                                                                                                                                             | n.d. | cortisone acetate (s. adrenohypophysitis)                      | complete recovery  |

|                            |      |    |      |                     |                           |                                                                                                                                       |             |                                                          |                                                                                                                                                                      |          |                                                                                                                    |                                          |                                                                                            |
|----------------------------|------|----|------|---------------------|---------------------------|---------------------------------------------------------------------------------------------------------------------------------------|-------------|----------------------------------------------------------|----------------------------------------------------------------------------------------------------------------------------------------------------------------------|----------|--------------------------------------------------------------------------------------------------------------------|------------------------------------------|--------------------------------------------------------------------------------------------|
| <b>Mandel et al [17]</b>   | 2014 | 66 | male | metastatic melanoma | ipilimumab, lambrolizumab | ataxia, vertigo, numbness left arm; convulsive status                                                                                 | 10-12 weeks | cc 6, protein 1.03 g/l                                   | parieto-occipital<br>1. brain MRI: unremarkable (motion artifact);<br>2. brain MRI: FLAIR hyperintensities bilat. Claustrum + right frontal and left occipital lobes | n.d.     | none (anticonvulsive therapy)                                                                                      | complete recovery                        | open biops, lymphocytic infiltrates of right frontal lesion: diffuse microglial activation |
| <b>Bompaire et al [18]</b> | 2012 | 56 | male | metastatic melanoma | ipilimumab                | <b>meningo-radiculoneuritis</b> (vertigo, dizziness, headache; rep. falls, dysarthria, dysaesthesia; severe gait ataxia, tetraplegia) | 10 weeks    | 1. cc 135, protein 5 g/l;<br>2. cc 104, protein 4.45 g/l | brain MRI: inconspicuous; <b>spinal MRI</b> : global enhancement of nerve-roots                                                                                      | negative | oral prednisone 80 mg/d; methylpredn. i.v. 1g/d 3 days, IVIG 0,4g/kg/d 5 days + oral prednisone 1 mg/kg/d 4 months | almost complete recovery after 24 months | two conduction blocs (left perone, right cubital), acute deervation lower limbs            |
| <b>Altman et al [19]</b>   | 2015 | 32 | male | metastatic melanoma | ipilimumab                | <b>bilateral facial palsy</b><br><br>hypophysitis 11/2011;<br><b>encephalopathy</b> 08/2012 +                                         | 5 weeks     | n.d.                                                     | n.d.                                                                                                                                                                 | n.d.     | oral prednisone 80- 100 mg/d                                                                                       | improvement                              |                                                                                            |
| <b>Carl et al [20]</b>     | 2015 | 64 | male | prostate cancer     | ipilimumab                | autoimmune thyroiditis: SREAT (adynamia, memory disturbances; myocloni,                                                               | 52 weeks    | cc normal, protein 0,85 g/l                              | mild microangiopathic changes                                                                                                                                        | negative | oral prednisolone 50 mg/d; methylpredn. i.v. 1g/d 3 days                                                           | major improvement                        |                                                                                            |

|                          |      |    |        |                             |                        |                                                                                                                                                                 |                                         |                                    |                                                                                       |          |                                                                         |                                                                                                                              |
|--------------------------|------|----|--------|-----------------------------|------------------------|-----------------------------------------------------------------------------------------------------------------------------------------------------------------|-----------------------------------------|------------------------------------|---------------------------------------------------------------------------------------|----------|-------------------------------------------------------------------------|------------------------------------------------------------------------------------------------------------------------------|
| <b>Conry et al [21]</b>  | 2015 | 41 | male   | metastatic melanoma         | ipilimumab             | seizures)<br><b>encephalopathy</b><br>(fever, headache, myalgia; expressive aphasia, gait ataxia), peripheral symptoms (sensory neuropathy, neurogenic bladder) | 7.5 weeks                               | cc 128, minimally elevated protein | cMRI: restricted diffusion/FLAIR hyperintensity posterior splenium of corpus callosum | negative | oral prednisone 30 mg/d; later 1 mg/kg; methylpredn. i.v. 2mg/kg 5 days | major improvement                                                                                                            |
| <b>Wilson et al [22]</b> | 2018 | 35 | male   | Hodgkin lymphoma, relapsing | pembrolizumab          | <b>LETM</b><br>(spastic tetraparesis, constipation, vomiting)                                                                                                   | 4 weeks                                 | cc 24                              | LETM pons-lower thoracic spine                                                        | negative | methylprednisolone i.v.; plasma exchange                                | improvement                                                                                                                  |
| <b>Strik et al [23]</b>  | 2017 | 53 | male   | B-NHL                       | nivolumab              | <b>encephalitis</b><br>(double vision, dysarthria, ataxia, mild cognitive dysfunction)                                                                          | not clear (patient reported with delay) | cc 15, protein 0.6-0.98 g/l        | small FLAIR hyperintense, contrast-enhancing lesions periventr., midbrain, brainstem  | negative | methylpredn. i.v. 1g/d 5 days; IVIG 1x; cyclophosphamide 2x 750 mg      | symptoms stable but disabling; assisted suicide                                                                              |
| <b>Garcia et al [24]</b> | 2018 | 39 | female | nodular melanoma            | ipilimumab             | <b>meningoencephalomyelitis</b><br>(headache, flu-like symptoms)                                                                                                | 7 weeks                                 | pleocytosis                        | brain MRI & spinal MRI: leptomeningeal enhancement; pituitary enlargement             | negative | methylpredn. 1.0 mg/kg/d i.v.                                           | rapid improvement; relapse after 3 months<br>IVIG/steroid refractory: Infliximab 5mg/kg i.v. 3 doses: near complete recovery |
| <b>Naito et al [25]</b>  | 2018 | 57 | male   | SCLC                        | nivolumab + ipilimumab | <b>acute cerebellitis</b><br>(nystagmus, ataxia, dysarthria)                                                                                                    | 8 weeks                                 | cc 35, protein 0.94g/l             | marked cerebellar edema, diffuse FLAIR                                                | n.d.     | 2x methylpredn. 1g/d 3 days, 6 cycles plasmapheresis                    | limited improvement                                                                                                          |

|                             |      |      |      |                                                                                                                 |                                   |                                                                                |                                                   |                                  |                                                           |                                   |                                                 |                                                                                |
|-----------------------------|------|------|------|-----------------------------------------------------------------------------------------------------------------|-----------------------------------|--------------------------------------------------------------------------------|---------------------------------------------------|----------------------------------|-----------------------------------------------------------|-----------------------------------|-------------------------------------------------|--------------------------------------------------------------------------------|
|                             |      |      |      |                                                                                                                 |                                   |                                                                                |                                                   |                                  | hyperintense cerebellar lesions                           |                                   | is; 2 cycles rituximab 375 mg/m2                |                                                                                |
| <b>Bot et al [26]</b>       | 2013 | 51   | male | metastatic melanoma, cerebral metastasis                                                                        | ipilimumab                        | <b>meningitis</b> (severe headache, fever)                                     | 3 weeks?                                          | cc 20, protein 0.87 g/l          | no new lesions                                            | n.d.                              | dexamethasone p.o. 8 mg/d                       | complete recovery                                                              |
| <b>Martinot et al [27]</b>  | 2018 | 54   | male | Hodgkin lymphoma                                                                                                | nivolumab                         | <b>PML</b> (progressive hemiparesis left)                                      | 3 weeks after last course (14 months after start) | cc 1, PCR: JCV 2230 c/ml         | multiple nonenhancing lesions                             | n.d.                              | none                                            | no improvement                                                                 |
| <b>Matsuoka et al. [28]</b> | 2018 | 60   | male | pleomorphic lung carcinoma                                                                                      | nivolumab                         | <b>limbic encephalitis</b> (drowsiness, muscular weakness, respiratory arrest) | 5 weeks                                           | cc 16, protein 1.62 g/l, OKB pos | T2 lesions temporal lobe, thalamus, aqueduct, spinal cord | anti-Hu AB positive (before Nivo) | high dose methylprednisolone, 2x plasmapheresis | death                                                                          |
| <b>Chaucer et al [29]</b>   | 2018 | 44   | male | metastatic renal cell carcinoma + HLRCC (autosomal dominant hereditary Leiomyomatosis and Renal Cell Carcinoma) | nivolumab                         | <b>encephalitis</b> (deteriorated mentation, hallucinations, aggressiveness)   | 2 weeks                                           | n.d.                             | no metastases, no other lesions                           | n.d.                              | none                                            | improvement                                                                    |
| <b>Patel et al. [30]</b>    | 2019 | 44   | male | clear cell renal cell carcinoma                                                                                 | nivolumab; nivolumab + ipilimumab | non-infectious inflammatory process of the brain mimicking brain abscess       | ~ 9 weeks                                         | n.d.                             | ring enhancing lesion in surgical cavity                  | n.d.                              | dexamethasone                                   | complete recovery<br>nivolumab and ipilimumab restarted 5 weeks post-admission |
| <b>Quach et al [31]</b>     | 2019 | n.a. | male | metastatic melanoma                                                                                             | pembrolizumab                     | <b>meningoencephalitis</b> (headache, altered mental                           | ~7 weeks                                          | inflammatory changes             | n.a.                                                      | n.d.                              | high-dose steroids                              | complete recovery                                                              |

| Author               | Year | Age | Sex    | Primary Disease                   | Treatment | Neurological Status                                                                                                           | Duration | CSF Findings                      | Imaging                                                                                      | Other Findings                              | Treatment                                                                                            | Outcome             |
|----------------------|------|-----|--------|-----------------------------------|-----------|-------------------------------------------------------------------------------------------------------------------------------|----------|-----------------------------------|----------------------------------------------------------------------------------------------|---------------------------------------------|------------------------------------------------------------------------------------------------------|---------------------|
| Zafar et al [32]     | 2019 | 59  | female | laryngeal squamous cell carcinoma | nivolumab | status) + epididymo-Orchitis<br><br><b>acute demyelinating encephalitis</b> (Nauseas, falls, weakness, altered mental status) | 2 weeks  | cc 74, elevated protein, OCB pos  | multiple FLAIR hyperintense lesions parietal lobes + corpus callosum, Pons                   |                                             | methylprednisolone 1g/d 5 days, IVIG 20g/d 4 days                                                    | gradual improvement |
|                      |      | 66  | female | lung adenocarcinoma               | nivolumab | <b>encephalitis</b> (right hemiballismus, dysarthria)                                                                         | 16 weeks | cc normal, protein 0.56 mg/dl     | T2-hyperintense basal ganglia abnormalities                                                  | novel, unclassified paraneoplastic AB (CSF) | methylprednisolone 1g/d 5 days; 5 PE; IVIG 2.5g/kg, rituximab 1000 mg 1x, tetrabenazine 20 mg (3x/d) | no improvement      |
| Shah et al [33]      | 2018 | 44  | female | lung adenocarcinoma               | nivolumab | <b>autoimmune encephalitis</b> (altered mental status, nausea, vomiting, seizure)                                             | ~9 weeks | cc 19, normal protein and glucose | T2 hyperintensities bilateral mesial temporal lobes + left occipital and right temporal lobe | GAD65-antibodies (CSF and serum)            | methylprednisolone 1g/d 5 days; rituximab 1000 mg every 6 months                                     | slight improvement  |
|                      |      | 78  | male   | malignant pleura mesothelioma     | nivolumab | <b>autoimmune encephalitis</b> (fever, somnolence, INO)                                                                       | 3 weeks  | cc 15, protein 0.9 g/l            | T2 hyperintensity mesencephalon and medial thalami (day 41)                                  | anti-Ma2 AB positive                        | steroids                                                                                             | major improvement   |
| De la Hoz et al [35] | 2019 | 28  | female | Hodgkin lymphoma                  | nivolumab | <b>autoimmune encephalitis</b> (headache, nausea, dizziness)                                                                  | 2 weeks  | cc 136, protein 0.6 g/l           | inconspicuous                                                                                | n.d.                                        | methylprednisolone 1mg/kg/d                                                                          | complete recovery   |

|                             |      |    |        |                                 |               |                                                                                                  |                                             |                           |                                                                            |                                         |                                                                         |                       |                                                                         |
|-----------------------------|------|----|--------|---------------------------------|---------------|--------------------------------------------------------------------------------------------------|---------------------------------------------|---------------------------|----------------------------------------------------------------------------|-----------------------------------------|-------------------------------------------------------------------------|-----------------------|-------------------------------------------------------------------------|
| <b>Kopecky et al [36]</b>   | 2018 | 63 | male   | metastatic renal cell carcinoma | nivolumab     | <b>encephalopathy</b><br>(change in behavior, uncontrolled movements: choreatic)                 | 12 weeks                                    | mild inflammatory changes | symmetrical, increased signal in basal ganglia                             | anti-Ma2 AB positive (CSF)              | methylprednisolone 2mg/kg/d; infliximab 5mg/kg                          | lost to follow-up     |                                                                         |
| <b>Leitinger et al [37]</b> | 2018 | 67 | female | squamous NSCLC                  | nivolumab     | <b>necrotizing encephalopathy</b><br>(disorientation, speech arrest, apraxia, seizures)          | 4.5 weeks                                   | cc 30, protein 0.56 g/l   | first: unremarkable; follow-up: multiple, confluent FLAIR hyperintensities | negative                                | IVIG 30g/d, 5 days; methylprednisolone 1g/d 2 days                      | no improvement, death | neuropathological: beginning necrosis both thalami, left central region |
| <b>Läubli et al [38]</b>    | 2017 | 53 | male   | lung adenocarcinoma             | nivolumab     | <b>cerebral vasculitis</b><br>(gait disturbance, speech difficulties)                            | not clear (soon after nivolumab initiation) | n.d.                      | new peritotemporal lesion                                                  | positive anti-SSA/Ro and anti-SSB/La AB | corticosteroids                                                         | improvement           | histologically: necrotizing encephalitis CD8+>CD4+ T cells              |
| <b>Choe et al [39]</b>      | 2016 | 45 | female | metastatic melanoma             | ipilimumab    | <b>meningoencephalitis</b><br>(confusion, dizziness, headache, myoclonic tremor)                 | 6 weeks                                     | cc 53, protein 1.51 g/l   | no changes                                                                 | negative                                | dexamethasone 8mg/d, methylprednisolone 1mg/kg/d; IVIG 0.4g/kg/d 5 days | major improvement     |                                                                         |
| <b>Brown et al [40]</b>     | 2016 | 67 | male   | metastatic melanoma             | pembrolizumab | <b>autoimmune limbic encephalitis</b><br>(short term memory loss, emotional lability, confusion) | ~28 weeks                                   | lymphocytic pleocytosis   | T2 hyperintensity medial temporal lobes + contrast enhancement             | CASPR2 AB (CSF + serum) positive        | methylprednisolone i.v.                                                 | improvement           |                                                                         |
| <b>Niki et al [41]</b>      | 2018 | 51 | male   | squamous NSCLC                  | pembrolizumab | <b>autoimmune encephalitis</b><br>(seizures, fever, headache, gait)                              | 24 weeks                                    | cc 58, protein 4.46g/l    | inconspicuous                                                              | negative                                | prednisolone 2mg/kg                                                     | improvement           |                                                                         |



disturbances)

**Table S2.** Overview of published case-reports regarding peripheral nervous system manifestations as neurological adverse events of ICI-therapy. Besides patients' clinical data certain diagnostic findings as well as immunosuppressive.

| author             | year | patient age | patient sex | underlying diseases | ICI therapy            | neurological symptoms | latency ICI-start/onset irAE | CSF findings | MRI     | antibody findings                                      | electrophysiology                                                                     | immunosupp. therapy                | outcome                  | additional information |
|--------------------|------|-------------|-------------|---------------------|------------------------|-----------------------|------------------------------|--------------|---------|--------------------------------------------------------|---------------------------------------------------------------------------------------|------------------------------------|--------------------------|------------------------|
| Wilson et al [22]  | 2018 | 57          | male        | metastatic melanoma | nivolumab + ipilimumab | myasthenia gravis     | 4 weeks                      | unknown      | unknown | negative                                               |                                                                                       | methylpredn . i.v.                 | rapid improvement        |                        |
| Johnson et al [42] | 2015 | 69          | female      | metastatic melanoma | ipilimumab             | myasthenia gravis     | around 10 weeks              | n.d.         | normal  | antibodies positive (1,9 nmol/l)                       | decrement positive                                                                    | methylpredn . i.v., plasmapheresis | improvement              |                        |
|                    |      | 73          | female      | metastatic melanoma | ipilimumab             | myasthenia gravis     | around 3 weeks               | n.d.         | n.d.    | antibodies positive (13,6 nmol/l)                      | n.d.                                                                                  | high-dose corticosteroids          | gradual improvement      |                        |
| Sciacca et al [43] | 2016 | 81          | male        | NSCLC               | nivolumab              | myasthenia gravis     | 4-5 weeks                    | n.d.         | n.d.    | antibodies 0,40 nmol/l                                 | repetitive nerve stimulation negative; single fibre EMG of orbicularis oculi abnormal | prednisone                         | complete remission of MG |                        |
| Shirai et al [44]  | 2016 | 81          | female      | metastatic melanoma | nivolumab              | myasthenia gravis     | 13 days                      | n.d.         | n.d.    | antibodies positive (12,4 mmol/l), others negative; CK | none                                                                                  | none                               | death                    |                        |

|                            |      |    |      |                        |                      |                                          |            |                  |        |                                             |                       |                                         |                                                  |                                                                                  |
|----------------------------|------|----|------|------------------------|----------------------|------------------------------------------|------------|------------------|--------|---------------------------------------------|-----------------------|-----------------------------------------|--------------------------------------------------|----------------------------------------------------------------------------------|
| <b>Polat et al [45]</b>    | 2016 | 65 | male | NSCLC                  | nivolumab            | <b>myasthenia gravis</b>                 | 6 weeks    | n.d.             | normal | negative                                    | normal                | pyridostigmine                          | continued improvement                            |                                                                                  |
| <b>Chang et al [46]</b>    | 2017 | 75 | male | metastatic bladder SCC | nivolumab            | <b>myasthenia gravis</b>                 | 3 weeks    | n.d.             | normal | AchR-AB positive (2,28 nmol/l), CK 1587 U/l | significant decrement | IVIG                                    | improvement                                      |                                                                                  |
| <b>Loochtan et al [47]</b> | 2017 | 70 | male | SCLC                   | ipilimumab+nivolumab | <b>myasthenia gravis</b>                 | 16 days    | n.d.             | n.d.   | AchR-antibodies positive (1,64 mmol/l)      | decrement             | prednisolone p.o.; IVIG; plasmapheresis | death (bleeding, AV-blocking)                    |                                                                                  |
| <b>Derle et al [48]</b>    | 2018 | 71 | male | metastatic melanoma    | ipilimumab           | <b>myasthenic crisis</b>                 | 1 month    | n.d.             | n.d.   | preexisting positive AchR-antibodies        | n.d.                  | plasma exchange, IVIG, methylpredn.     | death two years later due to respiratory failure | preexisting antibody positive MG, stable for 3 years under azathioprine 100 mg/d |
| <b>Montes et al [49]</b>   | 2018 | 74 | male | metastatic melanoma    | ipilimumab           | <b>myasthenia gravis</b>                 | 6 weeks    | no abnormalities | n.d.   | negative                                    | decrement positive    | high-dose corticosteroids               | marked improvement                               |                                                                                  |
| <b>Lau et al [50]</b>      | 2016 | 75 | male | metastatic melanoma    | pembrolizumab        | exacerbation of <b>myasthenia gravis</b> | 4-5 weeks  | n.d.             | n.d.   | n.d.                                        | n.d.                  | methylpredn. i.v.; IVIG                 | marked improvement                               | preexisting antibody positive MG since 4 years, stable under Aza 200 mg/d        |
| <b>Nguyen et al [51]</b>   | 2017 | 81 | male | metastatic melanoma    | pembrolizumab        | <b>myasthenia gravis</b>                 | 11,5 weeks | n.d.             | n.d.   | negative                                    | n.d.                  | prednisolone                            | complete                                         | pembrolizumab was                                                                |

| Author                     | Year | Age | Sex    | Primary Diagnosis                 | Treatment     | Secondary Diagnosis                   | Duration                      | Abnormalities    | Other Findings                                                                          | Antibodies                              | EMG/NCV                                                     | Treatment                                                             | Outcome                 | Notes                                                                           |
|----------------------------|------|-----|--------|-----------------------------------|---------------|---------------------------------------|-------------------------------|------------------|-----------------------------------------------------------------------------------------|-----------------------------------------|-------------------------------------------------------------|-----------------------------------------------------------------------|-------------------------|---------------------------------------------------------------------------------|
|                            |      |     |        | a                                 |               |                                       |                               |                  |                                                                                         |                                         |                                                             |                                                                       | recovery                | not stopped after ptosis                                                        |
|                            |      | 86  | female | metastatic melanoma               | pembrolizumab | <b>myasthenia gravis</b>              | 6,5 weeks                     | no abnormalities | normal                                                                                  | negative                                | nerve conduction and repetitive stimulation normal/negative | methylprednisolone i.v.                                               | improvement             |                                                                                 |
| <b>Alnahhas et al [52]</b> | 2017 | 84  | male   | metastatic melanoma               | pembrolizumab | <b>myasthenia gravis</b>              | 3 months                      | n.d.             | n.d.                                                                                    | Ach-R-antibodies positive (0,05 nmol/l) | n.d.                                                        | prednisone 60 mg/d, pyridostigmine 60 mg 1-1-1; IVIG 0,4g/kg/d 5 days | death                   |                                                                                 |
| <b>Zhu et al [53]</b>      | 2016 | 59  | female | metastatic melanoma               | pembrolizumab | <b>myasthenia gravis</b>              | around 11 weeks               | n.d.             | normal                                                                                  | negative                                | positive decrement                                          | prednisone, IVIG, plasmapheresis                                      | marked improvement      | history of myasthenia gravis, rheumatoid arthritis, Ach-R-AB initially positive |
| <b>Gonzalez et al [54]</b> | 2017 | 71  | female | metastatic uterine carcinosarcoma | pembrolizumab | <b>myasthenia gravis</b>              | after fourth dose (6-9 weeks) | n.d.             | n.d.                                                                                    | CK 1200 U/l, antibodies negative        | Single fiber EMG of the frontalis muscle abnormal           | pyridostigmine + prednisone                                           | significant improvement |                                                                                 |
| <b>Cooper et al [55]</b>   | 2017 | 68  | female | NSCLC                             | nivolumab     | <b>myasthenia gravis exacerbation</b> | 12 weeks                      | n.d.             | MRI brain + spinal cord: stable to minimally decreased size of known metastatic lesions | AChR 0.28 nmol/L                        | repetitive nerve stimulation : significant decrements       | pyridostigmine, prednisone, plasmapheresis                            | death                   | preexisting anti-AChR antibody positive ocular MG                               |
| <b>Mehta et</b>            | 2017 | 73  | male   | metastatic                        | nivolumab     | <b>myasthenia</b>                     | 18 days                       | no               | n.d.                                                                                    | AchR-a                                  |                                                             | prednisolon                                                           | slight                  |                                                                                 |

|                             |      |    |        |                           |                        |                                          |           |                  |                         |                                                              |                                                                                                                                                                                              |                                                        |                     |                                     |
|-----------------------------|------|----|--------|---------------------------|------------------------|------------------------------------------|-----------|------------------|-------------------------|--------------------------------------------------------------|----------------------------------------------------------------------------------------------------------------------------------------------------------------------------------------------|--------------------------------------------------------|---------------------|-------------------------------------|
| al [56]                     |      |    | female | renal cell carcinoma      |                        | <b>myasthenia gravis</b>                 |           | abnormalities    |                         | antibodies positive (8,7 mmol/l); CK 8950 U/l                |                                                                                                                                                                                              | pyridostigmine, IVIG, plasmapheresis                   | improvement         |                                     |
| <b>Becquart et al [57]</b>  | 2019 | 75 | female | metastatic melanoma       | nivolumab              | <b>myasthenia gravis</b>                 | 5 weeks   | no abnormalities | brain MRI: normal       | negative                                                     | normal                                                                                                                                                                                       | prostigmine                                            | improvement         | nivolumab continued for 1 more year |
| <b>Lara et al [58]</b>      | 2018 | 63 | female | NSCLC                     | pembrolizumab          | <b>myasthenia gravis</b>                 | ~ 3 weeks | n.d.             | brain MRI: unremarkable | highly elevated striatal muscle IgG antibody titer (1:1280). | n.d.                                                                                                                                                                                         | IVIG, high dose corticosteroid therapy, pyridostigmine | improvement         |                                     |
| <b>Werner et al [59]</b>    | 2019 | 62 | male   | metastatic melanoma       | nivolumab + ipilimumab | <b>myasthenia gravis</b>                 | 4 weeks   | cc 13/ $\mu$ l   | brain MRI: normal       | negative                                                     | Repetitive stimulation : action potential decrement of 14% low-amplitude compound muscle action potentials (CMAP), increasing >2 after brief exercise; positive repetitive nerve stimulation | pyridostigmine, prednisone                             | complete recovery   |                                     |
| <b>Nakatan i et al [60]</b> | 2018 | 73 | female | squamous cell lung cancer | nivolumab              | <b>Lambert-Eaton myasthenic syndrome</b> | 20 weeks  | n.d.             | n.d.                    | anti-P/Q-type VGCC antibodies positive                       |                                                                                                                                                                                              | pyridostigmine, ambenonium, 4-DAP                      | gradual improvement |                                     |

|                          |      |    |        |                                         |                        |                                                    |           |                  |                                                 |                                                                |                                                |                                                        |                                      |                                      |
|--------------------------|------|----|--------|-----------------------------------------|------------------------|----------------------------------------------------|-----------|------------------|-------------------------------------------------|----------------------------------------------------------------|------------------------------------------------|--------------------------------------------------------|--------------------------------------|--------------------------------------|
| <b>Kimura et al [61]</b> | 2016 | 80 | male   | metastatic melanoma                     | nivolumab              | <b>myasthenic crisis and polymyositis</b>          | 2 weeks   | n.d.             | n.d.                                            | AchR-antibodies positive (28 nmol/l) (before ICI: 10,2 nmol/l) | n.d.                                           | methylpredn . i.v.; IVIG, plasma exchange              | improvement                          | muscle biopsy: myositis              |
| <b>March et al [62]</b>  | 2018 | 63 | male   | metastatic melanoma                     | pembrolizumab          | <b>myasthenia gravis + myositis</b>                | 2 weeks   | n.d.             | normal (except for previously known metastases) | AchR-AB positive, CK 10286 U/l                                 | n.d.                                           | prednisone, pyridostigmine; IVIG; plasmapheresis       | no improvement, death                |                                      |
| <b>Chen et al [63]</b>   | 2017 | 57 | male   | squamous cell carcinoma lung            | nivolumab + ipilimumab | <b>coexisting myasthenia gravis, myositis, PNP</b> | 4-6 weeks | no abnormalities | n.d.                                            | AchR-antibody slightly elevated                                | axonal polyneuropathy                          | prednisolone i.v. + pyridostigmine                     | improvement, death through infection |                                      |
| <b>Liao et al [64]</b>   | 2014 | 70 | female | metastatic uveal melanoma               | ipilimumab             | <b>myasthenia gravis + myositis</b>                | 6 weeks   | n.d.             | sMRI: degenerative disease                      | AchR-AB positive (2,09 nmol/l), CK 1200 U/l                    | diffuse myopathic findings; decrement positive | methylpredn . i.v., plasmapheresis; IVIG               | improvement                          |                                      |
| <b>Tan et al [65]</b>    | 2017 | 45 | male   | squamous cell carcinoma lung            | nivolumab              | <b>myasthenic crisis + myositis</b>                | 2 weeks   | n.d.             | brain MRI: normal                               | Ach-R-antibodies 2,0 nmol/l                                    | no decrement                                   | methylpredn . i.v.; IVIG                               | improvement                          | muscle biopsy: inflammatory myopathy |
| <b>Huh et al [66]</b>    | 2018 | 34 | female | thymic cancer (Squamous cell carcinoma) | pembrolizumab          | <b>myasthenic gravis + myositis</b>                | unknown   | n.d.             | normal                                          | Ach-R-antibodies 0,86 nmol/l; CK 2125 U/l                      | normal                                         | IVIG, methylprednisolone, prednisolone; plasmapheresis | improvement                          |                                      |

|                           |      |    |        |                                       |                        |                                                                        |         |      |      |                                                                                  |                                                                                      |                                                    |                                        |                                                                    |
|---------------------------|------|----|--------|---------------------------------------|------------------------|------------------------------------------------------------------------|---------|------|------|----------------------------------------------------------------------------------|--------------------------------------------------------------------------------------|----------------------------------------------------|----------------------------------------|--------------------------------------------------------------------|
| <b>Konoeda et al [67]</b> | 2017 | 74 | female | advanced colon cancer                 | nivolumab              | <b>myasthenic gravis + myositis</b>                                    | 3 weeks | n.a. | n.a. | n.a.                                                                             | n.a.                                                                                 | methylpredn . i.v.; IVIG; plasma exchange          | n.a.                                   |                                                                    |
| <b>Kang et al [68]</b>    | 2018 | 75 | male   | head and neck squamous cell carcinoma | nivolumab              | <b>myositis and myasthenia gravis</b>                                  | 3 weeks | n.d. | n.d. | positive AChR-antibodies, anti-striated muscle antibodies 1:320; CK 2593 U/L     | n.d.                                                                                 | methylpredn . i.v., plasmapheresis, pyridostigmine | minimal improvement                    |                                                                    |
| <b>So et al. [69]</b>     | 2019 | 55 | female | metastatic melanoma                   | nivolumab              | <b>severe myasthenia gravis + necrotizing myopathy and myocarditis</b> | 2 weeks | n.d. | n.d. | positive AChR Ab (29 nmol/L), CK 13652 U/l                                       | single-fiber electromyography: neuromuscular junction dysfunction (increased jitter) | steroid pulse, IVIG, plasma exchange               | gradual improvement                    | AChR Ab (72 nmol/L) positive before nivolumab                      |
| <b>Moslehi et al [70]</b> | 2017 | 65 | female | metastatic melanoma                   | nivolumab + ipilimumab | <b>myocarditis + myositis</b>                                          | 12 days | n.d. | n.d. | antibodies n.d.; CK 17.720 U/l Trop I 51,3 ng/ml antibodies n.d.; CK 20.270 U/l, | n.d.                                                                                 | methylpredn . i.v.                                 | death due to multisystem organ failure | postmortem cardiac and skeletal muscle biopsy: T-cell infiltration |
|                           |      | 63 | male   | metastatic melanoma                   | nivolumab + ipilimumab | <b>myocarditis + myositis</b>                                          | 15 days | n.d. | n.d. |                                                                                  | n.d.                                                                                 | methylpredn . i.v.; Infliximab                     | death due to cardiac arrest            | postmortem cardiac and skeletal muscle biopsy:                     |

| Author(s)                           | Year | Age | Sex    | Primary Disease                | Treatment  | Myositis Type                         | Duration       | Abnormalities          | sMRI                                    | Antibodies                                                                                  | EMG                                                        | Immunosuppression                       | Response           | Biopsy Findings                                                                                                                |
|-------------------------------------|------|-----|--------|--------------------------------|------------|---------------------------------------|----------------|------------------------|-----------------------------------------|---------------------------------------------------------------------------------------------|------------------------------------------------------------|-----------------------------------------|--------------------|--------------------------------------------------------------------------------------------------------------------------------|
| <b>Bourgeois-Vionnet et al [71]</b> | 2018 | 79  | male   | metastatic lung adenocarcinoma | nivolumab  | <b>myositis</b>                       | 3 weeks        | no abnormalities       | unremarkable                            | antibodies negative; CK 2450 U/L                                                            | Single fiber EMG and repetitive nerve stimulation negative | monthly IVIGs, oral corticosteroids     | marked improvement | T-cell infiltration<br>muscle biopsy: fascicular myonecrosis, phagocytosis, perivascular inflammatory infiltrates CD8+ T-cells |
| <b>Fox et al [72]</b>               | 2016 | 75  | female | metastatic melanoma            | nivolumab  | <b>myositis</b>                       | 2-3 weeks      | n.d.                   | n.d.                                    | antibodies n.d.; CK 1180 U/l                                                                | n.d.                                                       | prednisone                              | improvement        |                                                                                                                                |
| <b>Saini et al [73]</b>             | 2017 | 35  | male   | Hodgkin lymphoma               | nivolumab  | <b>inflammatory myositis</b>          | 17 weeks       | n.a.                   | n.a.                                    | n.a.                                                                                        | n.a.                                                       | n.a.                                    | n.a.               |                                                                                                                                |
| <b>Badovinac et al [74]</b>         | 2018 | 64  | female | squamous cell lung cancer      | nivolumab  | <b>inflammatory myositis</b>          | 28 weeks       | n.d.                   | n.d.                                    | CK 2657 U/l; antibodies negative<br>TPO-AB positive, ANA 1:320; others negative (TRAK, SOX, | n.d.                                                       | methylpredn . i.v.                      | marked improvement | muscle biopsy: inflammatory origin of muscle fibers damage                                                                     |
| <b>Pushkar evskaya et al [75]</b>   | 2017 | 60  | female | metastatic melanoma            | ipilimumab | <b>ocular myositis + hypophysitis</b> | about 17 weeks | 3 normal lumbar punct. | brain MRI: preexisting brain metastases | antibodies negative (TRAK, SOX,                                                             | n.d.                                                       | methylpredn . i.v., mycophenolate; IVIG | marked improvement |                                                                                                                                |

| Author              | Year | Age  | Sex    | Primary Disease     | Treatment     | Secondary Disease | Duration                         | Outcome | Diagnosis                                                                          | Lab                                             | Response               | Treatment                           | Outcome                               | Notes                                                            |
|---------------------|------|------|--------|---------------------|---------------|-------------------|----------------------------------|---------|------------------------------------------------------------------------------------|-------------------------------------------------|------------------------|-------------------------------------|---------------------------------------|------------------------------------------------------------------|
|                     |      | 60   | female | metastatic melanoma | ipilimumab    | ocular myositis   | 5 weeks                          | n.d.    | orbital MRI: thickening of right superior oblique muscle; later: all other muscles | ANA 1:320, others negative                      | n.d.                   | methylpredn . i.v., mycophenolate   | marked improvement                    |                                                                  |
| Lecoufle et al [76] | 2013 | n.a. | female | metastatic melanoma | ipilimumab    | orbital myositis  | around 6-9 weeks                 | n.d.    | orbital MRI: contrast enhancement left lateral rectus muscle                       | negative                                        | n.d.                   | high-dose steroids oral             | complete recovery                     |                                                                  |
| Sheik et al [77]    | 2015 | 55   | female | metastatic melanoma | ipilimumab    | dermatomyositis   | 2 weeks; relapse after 14 months | n.d.    | n.d.                                                                               | ANA 1:640, others negative (Jo-1.); CK 1854 U/l | n.d.                   | prednisone; methylpredn . i.v.      | marked improvement of muscle strength | muscle biopsy: atrophy but no inflammatory myositis              |
| Yoshioka et al [78] | 2015 | 84   | male   | metastatic melanoma | nivolumab     | myositis          | 7 weeks                          | n.d.    | n.d.                                                                               | antibodies n.d.; CK 2812 U/l                    | n.d.                   | prednisolone                        | complete recovery                     |                                                                  |
| Vallet et al [79]   | 2016 | 86   | female | metastatic melanoma | pembrolizumab | necrotic myositis | 3,5 weeks                        | n.d.    | n.d.                                                                               | negative                                        | EMG: myopathic changes | methylpredn . i.v., plasma exchange | complete recovery                     | muscle biopsy: multifocal necrosis, endomyosial CD8+ infiltrates |
| Haddox et al [80]   | 2017 | 78   | male   | metastatic melanoma | pembrolizumab | bulbar myopathy,  | 5 weeks                          | n.d.    | sMRI: symmetric                                                                    | striational                                     | EMG: MUAP              | prednisone, plasma                  | death                                 | muscle biopsy:                                                   |





|                              |      |    |        |                     |                           |                                               |           |                                           |                                                                                      |                                                                                        |                                                                       |                                 |                                                                                       |                                                                            |
|------------------------------|------|----|--------|---------------------|---------------------------|-----------------------------------------------|-----------|-------------------------------------------|--------------------------------------------------------------------------------------|----------------------------------------------------------------------------------------|-----------------------------------------------------------------------|---------------------------------|---------------------------------------------------------------------------------------|----------------------------------------------------------------------------|
| <b>Carrera et al. [85]</b>   | 2017 | 68 | male   | NSCLC               | tremelimumab + durvalumab | <b>myopathy involving extraocular muscles</b> | 1 month   | n.d.                                      | brain MRI: normal                                                                    | antibodies negative; CK 3083 U/l                                                       | EMG: complex polyphasic motor unit potentials -->inflamm at. myopathy | prednisone                      | improvement                                                                           | muscle biopsy: infiltrat. Of endomysium and perimysium by CD4-, CD8+ cells |
| <b>Kadota et al. [86]</b>    | 2019 | 85 | female | metastatic melanoma | nivolumab                 | <b>dermatomyositis</b>                        | 4 weeks   | n.d.                                      | n.d.                                                                                 | negative                                                                               | n.d.                                                                  | prednisolone                    | improvement                                                                           |                                                                            |
| <b>Ogawa et al. [87]</b>     | 2017 | 88 | male   | metastatic melanoma | nivolumab                 | <b>polymyositis</b>                           | 6 weeks   | n.d.                                      | n.d.                                                                                 | negative                                                                               | EMG: myogenic pattern                                                 | oral prednisolone, azathioprine | death                                                                                 |                                                                            |
| <b>Sekiguchi et al. [88]</b> | 2019 | 78 | male   | bladder cancer      | pembrolizumab             | <b>myositis + diaphragm involvement</b>       | 2 weeks   | n.d.                                      | n.d.                                                                                 | AChR-AB positive 9.5 nmol/l; anti-str iational muscle antibodies positive; CK 2015 U/l | no decrement in repetitive stimulation                                | methylpredn . i.v., IVIG        | partial improvement (limb muscle weakness recovered but respiratory function did not) |                                                                            |
|                              |      | 52 | male   | metastatic melanoma | nivolumab + ipilimumab    | <b>GBS</b>                                    | 3-4 weeks | protein 2.3 g/l                           | inconspicuous                                                                        | negative                                                                               |                                                                       | IVIG                            | very good recovery rapid motor improvement;                                           |                                                                            |
| <b>Garcia et al [24]</b>     | 2018 | 55 | male   | melanoma IIIB       | ipilimumab                | <b>acute infl. demyelinating PNP</b>          | 6 weeks   | lymphocytic pleocytosis, protein 1.75 g/l | abnormal enhancement bilat. 5th, 7th, 8th cranial nerves, cauda equina, conus normal | negative                                                                               |                                                                       | methylpredn . i.v.              | minimal paresthesia continued                                                         |                                                                            |
| <b>Bot et al</b>             | 2013 | 63 | male   | metastatic          | ipilimumab                | <b>axonal GBS</b>                             | about 12  | cc normal,                                |                                                                                      |                                                                                        |                                                                       | IVIG                            | died                                                                                  |                                                                            |

|                           |      |    |        |                     |                        |                                    |                                    |                                      |                                       |                                  |                                                                                                      |                           |  |  |                                |
|---------------------------|------|----|--------|---------------------|------------------------|------------------------------------|------------------------------------|--------------------------------------|---------------------------------------|----------------------------------|------------------------------------------------------------------------------------------------------|---------------------------|--|--|--------------------------------|
| [26]                      |      |    | male   | melanoma            |                        |                                    | 3 weeks (3 weeks after 4th course) | protein 0.89 g/l                     |                                       |                                  |                                                                                                      |                           |  |  | from respiratory insufficiency |
| Ong et al [89]            | 2018 | 66 | male   | lung adenocarcinoma | pembrolizumab          | GBS                                | 1 month                            |                                      | spinal MRI: only degenerative changes | negative                         | tibial DML prolonged, partial conduction block peroneus bilateral, sparing of sural sensory response | methylpredn . i.v.; IVIG  |  |  | almost full recovery           |
| De Maleissye et al [90]   | 2016 | 45 | female | melanoma            | pembrolizumab          | GBS                                | 8 weeks                            | slight pleocytosis, protein 0.56 g/l | normal                                | negative                         | multifocal demyelination with conduction blocks                                                      | prednisolone, IVIG        |  |  | improvement                    |
| Schneiderbauer et al [91] | 2017 | 51 | male   | metastatic melanoma | nivolumab              | GBS                                | 5 months                           | cc normal, protein 0.73 g/l          | brain MRI and sMRI: normal            | negative                         | acute demyelinating sensorimotor or PNP                                                              | methylpredn . i.v. + IVIG |  |  | nearly complete recovery       |
| Fukumoto et al [92]       | 2018 | 66 | male   | metastatic NSCLC    | nivolumab              | acute demyelinating polyneuropathy | 3 weeks                            | cc 4/ $\mu$ l, protein 3.4 g/l       | n.d.                                  | GM2-+ Ga1Nac-GD1a-IgM-antibodies | DML prolonged, NCV reduced                                                                           | prednisolone; IVIG        |  |  | improvement                    |
| Supakornnumpon et al [93] | 2017 | 77 | male   | metastatic melanoma | ipilimumab + nivolumab | GBS                                | 7 weeks                            | cc normal, protein 0.86 g/l          | n.d.                                  | n.d.                             | reduced median and ulnar cMAP amplitudes, median and ulnar conduction blocks in forearm              | prednisone, IVIG          |  |  | improvement                    |
| Yost et                   | 2017 | 64 | male   | melanoma            | ipilimumab +           | GBS                                | 17                                 | cc 12/ $\mu$ l,                      | subtle                                | negative                         | mildly slow                                                                                          | IVIG,                     |  |  | marked                         |

|                      |      |    |        |                                         |                        |                                            |                           |                                                       |                                                                                        |          |                                                                              |                                                           |                                                                                    |
|----------------------|------|----|--------|-----------------------------------------|------------------------|--------------------------------------------|---------------------------|-------------------------------------------------------|----------------------------------------------------------------------------------------|----------|------------------------------------------------------------------------------|-----------------------------------------------------------|------------------------------------------------------------------------------------|
| al [94]              |      |    | male   |                                         | pembrolizumab          |                                            | months ??                 | protein 1.95 g/l                                      | enhancement of facial nerves                                                           | negative | lower limb motor conduction velocities, pathological blink reflexes          | prednisone p.o.                                           | improvement                                                                        |
| Jacob et al [95]     | 2016 | 68 | female | metastatic squamous cell carcinoma lung | nivolumab              | GBS                                        | 3 months                  | cc normal, protein 0.85 g/l                           | sMRI: normal                                                                           | n.d.     | n.d.                                                                         | IVIG + plasmapheresis                                     | death (respiratory failure)                                                        |
| Wilgenhof et al [96] | 2011 | 57 | female | metastatic melanoma                     | ipilimumab             | GBS                                        | 7 weeks                   | cc normal, protein 1.67 g/l                           | brain MRI + sMRI: normal                                                               | n.d.     | motor and sensory demyelinating PNP f-waves                                  | methylpredn . i.v.                                        | nearly complete recovery                                                           |
| Kelly Wu et al [97]  | 2017 | 37 | female | metastatic melanoma                     | ipilimumab             | GBS                                        | unknown                   | unknown                                               | n.d.                                                                                   | negative | prolonged, amplitudes smaller acute generalized motor predominant neuropathy | Droxidopa, IVIG                                           | slight improvement                                                                 |
| Gu et al [98]        | 2017 | 49 | female | metastatic melanoma                     | ipilimumab + nivolumab | acute neuropathy                           | 5 days                    | cc: 15/ $\mu$ l, protein 1.15 g/l                     | spinal MRI: normal                                                                     | negative |                                                                              | IVIG, methylpredn . i.v.; mycophenolate + plasma exchange | mild improvement; relapse after 1 month death (hemorrhage within brain metastasis) |
|                      |      | 81 | male   | metastatic melanoma (brain metastases)  | pembrolizumab          | acute inflammatory demyelinating PNP       | 4 weeks (after 2nd cycle) | albuminocytol. dissociation with elevated CSF protein | brain MRI: brain metastases                                                            | negative | consistent with motor and sensory neuropathy                                 | methylpredn ., IVIG, plasmapheresis                       |                                                                                    |
| Nukui et al. [99]    | 2018 | 45 | male   | nasal cancer                            | nivolumab              | acute demyelinating polyradiculoneuropathy | ~ 10 weeks                | cc 7/ $\mu$ l, protein 3.5 g/l                        | brain MRI: not remarkable; spinal MRI: gadolinium enhancement of nerve roots and cauda | negative | prolonged distal latency (DL), reduced nerve conduction velocity (NCV)       | IVIG, steroid pulse therapy                               | improvement                                                                        |

|                                   |      |    |        |                     |                            |                                |          |                                                                                                                  |                                                                         |          |                                                                                                                       |                                                           |                         |                                                                                |
|-----------------------------------|------|----|--------|---------------------|----------------------------|--------------------------------|----------|------------------------------------------------------------------------------------------------------------------|-------------------------------------------------------------------------|----------|-----------------------------------------------------------------------------------------------------------------------|-----------------------------------------------------------|-------------------------|--------------------------------------------------------------------------------|
|                                   |      | 85 | female | metastatic melanoma | ipilimumab + pembrolizumab | <b>CIDP</b>                    | 20 weeks | cc normal, protein 0.74 g/l                                                                                      | equina<br>normal                                                        | negative | multifocal demyelination with conduction blocks all potentials of blink response markedly delayed (demyelinating PNP) | oral and i.v. glucocorticoids, plasma exchange            | no improvement          |                                                                                |
|                                   |      | 44 | male   | metastatic melanoma | ipilimumab                 | <b>CIDP</b>                    | 1 week   | cc normal, protein 0.44 g/l                                                                                      | normal (except for previously known metastases)                         | negative |                                                                                                                       | plasmapheresis                                            | significant improvement |                                                                                |
| <b>Thaipisuttikul et al [100]</b> | 2015 | 57 | male   | metastatic melanoma | ipilimumab                 | <b>peripheral neuropathy</b>   | 36 days  | 1. cc 78/ $\mu$ l, protein 0.68 g/l<br>2. cc 79/ $\mu$ l, protein 0.95 g/l<br>3. cc 8/ $\mu$ l, protein 0.32 g/l | brain MRI + sMRI: normal                                                | negative | symetric sensorimotor or PNP                                                                                          | methylpredn.; infliximab; IVIG; tacrolimus + methylpredn. | slight improvement      |                                                                                |
| <b>Tanaka et al [101]</b>         | 2016 | 85 | female | metastatic melanoma | nivolumab                  | <b>CIDP</b>                    | 2 weeks  | cc 11/ $\mu$ l, protein 3.58 g/l                                                                                 | brain MRI: normal; sMRI: gadolinium enhancement C7 and Th1 dorsal roots | negative | F-wave latency prolonged, conduction blocks                                                                           | prednisolone; IVIG                                        | improvement             | suralis biopsy: loss of small myelinated fibres, mild lymphocytic infiltration |
| <b>Sepulveda et al [102]</b>      | 2017 | 44 | male   | metastatic melanoma | pembrolizumab              | <b>motor polyradiculopathy</b> | 47 weeks | cc normal, protein 0.67 g/l                                                                                      | brain MRI: normal; sMRI: diffuse enhancement of dorsal roots            | negative | ENG: normal, EMG: reduction of number of active motor unit potentials                                                 | IVIG + oral prednisone; plasma exchange                   | gradual improvement     |                                                                                |
| <b>Aya et al</b>                  | 2017 | 53 | female | metastatic          | ipilimumab;                | <b>vasculitic</b>              | 2 weeks  | n.d.                                                                                                             | n.d.                                                                    | n.d.     | moderate                                                                                                              | methylpredn                                               | slow                    | preexisting                                                                    |

|                       |      |    |        |                                 |                                                    |                                           |               |                                                        |                                  |                         |                                 |                                     |                     |                                                                                                            |
|-----------------------|------|----|--------|---------------------------------|----------------------------------------------------|-------------------------------------------|---------------|--------------------------------------------------------|----------------------------------|-------------------------|---------------------------------|-------------------------------------|---------------------|------------------------------------------------------------------------------------------------------------|
| [103]                 |      |    | male   | melanoma                        | pembrolizumab                                      | neuropathy                                |               |                                                        |                                  |                         | sensory PNP                     | . i.v., oral prednisolone           | improvement         | seropositive RA; muscle biopsy: perivascular infiltration (small endoneurial vessels) of mononuclear cells |
| Manam et al [104]     | 2018 | 73 | male   | adenocarcinoma of the lung      | pembrolizumab                                      | inflammatory demyelinating PNP            | 3 weeks       | albumino-cytol. dissociation with elevated CSF protein | n.d.                             | negative                | n.d.                            | methylpredn., IVIG, plasmapheresis  | gradual improvement |                                                                                                            |
| Simsek et al. [105]   | 2018 | 52 | male   | metastatic renal cell carcinoma | nivolumab                                          | peripheral neuropathy                     | 10 weeks      | n.d.                                                   | brain MRI and sMRI: unremarkable | CK 2440 U/l             | n.d.                            | methylpredn. i.v.                   | improvement         |                                                                                                            |
|                       |      | 62 | male   | metastatic melanoma             | ipilimumab                                         | peripheral neuropathy                     | 13 weeks      | n.d.                                                   | n.d.                             | n.d.                    | n.d.                            | methylpredn. i.v. + mycophenolate   | full improvement    |                                                                                                            |
| Sakai et al [106]     | 2017 | 81 | male   | metastatic melanoma             | nivolumab                                          | mononeuropathy multiplex + rhabdomyolysis | 8 days        | cc 1/ $\mu$ l, protein 0.27 g/l                        | n.d.                             | negative (CK 27703 U/l) | axonal mononeuropathy multiplex | prednisolone i.v.                   | improvement         |                                                                                                            |
| Zecchini et al. [107] | 2018 | 45 | male   | metastatic melanoma             | ipilimumab + nivolumab, followed by nivolumab mono | Bell's palsy                              | 2 weeks       | cc 240/ $\mu$ l, protein 0.26 g/l                      | brain MRI: unremarkable          | n.d.                    | n.d.                            | oral valacyclovir + oral prednisone | complete resolution |                                                                                                            |
| Zieman et al [108]    | 2019 | 51 | female | metastatic melanoma             | ipilimumab + nivolumab                             | Bell's palsy + polyneuropathy             | 1 week        | n.d.                                                   | brain MRI: normal                | n.d.                    | n.d.                            | prednisone taper and acyclovir      | improvement         |                                                                                                            |
|                       |      | 68 | female | metastatic melanoma             | ipilimumab + nivolumab                             | Bell's palsy                              | about 3 weeks | n.d.                                                   | brain MRI: normal                | n.d.                    | n.d.                            | prednisone taper + valacyclovir.    | improvement         |                                                                                                            |

|                           |      |    |        |                     |                         |                                           |                |                              |                                                                                           |                                              |                                                                                         |                                                                                                  |                                            |                                                                                                                                                                           |
|---------------------------|------|----|--------|---------------------|-------------------------|-------------------------------------------|----------------|------------------------------|-------------------------------------------------------------------------------------------|----------------------------------------------|-----------------------------------------------------------------------------------------|--------------------------------------------------------------------------------------------------|--------------------------------------------|---------------------------------------------------------------------------------------------------------------------------------------------------------------------------|
| <b>Jinnur et al [109]</b> | 2015 | 66 | male   | metastatic melanoma | ipilimumab              | <b>bilateral phrenic nerve neuropathy</b> | about 12 weeks | n.d.                         | sMRI normal                                                                               | negative                                     | bilateral severe phrenic nerve neuropathies                                             | prednisone                                                                                       | no improvement (needed BiPAP during sleep) |                                                                                                                                                                           |
| <b>Ghosn et al [110]</b>  | 2018 | 69 | female | metastatic melanoma | pembrolizumab (+ T-VEC) | <b>sjögren's syndrome</b>                 | 20 weeks       | cc 92 /μl, protein 1.32 g/l, | brain MRI: enhancement of the right trigeminal Gasser's ganglia and its mandibular branch | anti-SSA elevated, other antibodies negative | absence of SNAPs in upper and lower limbs; reduced MAPs for the median and ulnar nerves | methylprednisone i.v.; IVIGs; 2nd line cyclophosphamide (replaced by rituximab)+ oral prednisone | improvement (but residuals)                | biopsy of accessory salivary glands (ASGB): abnormal interstitial sclerosis with a focus of > 50 lymphocytes/4 mm <sup>2</sup> (Chisholm and Mason's score of 3 out of 4) |

## References

1. Bossart, S.; Thurneysen, S.; Rushing, E.; Frontzek, K.; Leske, H.; Mihic-Probst, D.; Nagel, H.W.; Mangana, J.; Goldinger, S.M.; Dummer, R. Case Report: Encephalitis, with Brainstem Involvement, Following Checkpoint Inhibitor Therapy in Metastatic Melanoma. *Oncologist* **2017**, *22*, 749–753.
2. Burke, M.; Hardesty, M.; Downs, W. A case of severe encephalitis while on PD-1 immunotherapy for recurrent clear cell ovarian cancer. *Gynecol. Oncol. Rep.* **2018**, *24*, 51–53.
3. Maurice, C.; Schneider, R.; Kiehl, T.-R.; Bavi, P.; Roehrl, M.H.A.; Mason, W.P.; Hogg, D. Subacute CNS Demyelination after Treatment with Nivolumab for Melanoma. *Cancer Immunol. Res.* **2015**, *3*, 1299–1302.
4. Richard, K.; Weslow, J.; Porcella, S.L.; Nanjappa, S. A Case Report of Steroid Responsive Nivolumab-Induced Encephalitis. *Cancer Control.* **2017**, *24*, 1073274817729069.
5. Schneider, S.; Potthast, S.; Komminoth, P.; Schwegler, G.; Böhm, S. PD-1 Checkpoint Inhibitor Associated Autoimmune Encephalitis. *Case Rep. Oncol.* **2017**, *10*, 473–478.
6. Williams, T.J.; Benavides, D.R.; Patrice, K.-A.; Dalmau, J.O.; De Ávila, A.L.R.; Le, D.T.; Lipson, E.J.; Probasco, J.C.; Mowry, E.M. Association of Autoimmune Encephalitis With Combined Immune Checkpoint Inhibitor Treatment for Metastatic Cancer. *JAMA Neurol.* **2016**, *73*, 928.
7. Kawamura, R.; Nagata, E.; Mukai, M.; Ohnuki, Y.; Matsuzaki, T.; Ohiwa, K.; Nakagawa, T.; Kohno, M.; Masuda, R.; Iwazaki, M.; et al. Acute Cerebellar Ataxia Induced by Nivolumab. *Intern. Med.* **2017**, *56*, 3357–3359.
8. Narumi, Y.; Yoshida, R.; Minami, Y.; Yamamoto, Y.; Takeguchi, S.; Kano, K.; Takahashi, K.; Saito, T.; Sawada, J.; Terui, H.; et al. Neuromyelitis optica spectrum disorder secondary to treatment with anti-PD-1 antibody nivolumab: The first report. *BMC Cancer* **2018**, *18*, 95.
9. O’Kane, G.M.; Lyons, T.G.; Collieran, G.C.; Alken, S.; Kavanagh, E.C.; Ahmad, M.W.; Fitzpatrick, D.; Murray, B.; Kelly, C.M. Late-Onset Paraplegia after Complete Response to Two Cycles of Ipilimumab for Metastatic Melanoma. *Oncol. Res. Treat.* **2014**, *37*, 757–760.
10. Tan, I.; Malinzak, M.; Salama, A.K.S. Delayed onset of neurosarcoidosis after concurrent ipilimumab/nivolumab therapy. *J. Immunother. Cancer* **2018**, *6*, 77.
11. Salam, S.; Lavin, T.; Turan, A. Limbic encephalitis following immunotherapy against metastatic malignant melanoma. *BMJ Case Rep.* **2016**, *2016*, doi:10.1136/bcr-2016-215012.
12. Stein, M.K.; Summers, B.B.; Wong, C.A.; Box, H.L.; Cleveland, K.O. Meningoencephalitis Following Ipilimumab Administration in Metastatic Melanoma. *Am. J. Med. Sci.* **2015**, *350*, 512–513.
13. Khoja, L.; Maurice, C.; Chappell, M.; Macmillan, L.; Al-Habeeb, A.S.; Al-Faraidy, N.; Butler, M.O.; Rogalla, P.; Mason, W.; Joshua, A.M.; et al. Eosinophilic Fasciitis and Acute Encephalopathy Toxicity from Pembrolizumab Treatment of a Patient with Metastatic Melanoma. *Cancer Immunol. Res.* **2016**, *4*, 175–178.
14. Gettings, E.J.; Hackett, C.T.; Scott, T.F. Severe relapse in a multiple sclerosis patient associated with ipilimumab treatment of melanoma. *Mult. Scler.* **2015**, *21*, 670.
15. LaPorte, J.; Solh, M.; Ouanounou, S. Posterior reversible encephalopathy syndrome following pembrolizumab therapy for relapsed Hodgkin’s lymphoma. *J. Oncol. Pharm. Pract.* **2017**, *23*, 71–74.
16. Maur, M.; Tomasello, C.; Frassoldati, A.; Dieci, M.V.; Barbieri, E.; Conte, P. Posterior Reversible Encephalopathy Syndrome During Ipilimumab Therapy for Malignant Melanoma. *J. Clin. Oncol.* **2012**, *30*, e76–e78.
17. Mandel, J.J.; Olar, A.; Aldape, K.D.; Tremont-Lukats, I.W. Lambrolizumab induced central nervous system (CNS) toxicity. *J. Neurol. Sci.* **2014**, *344*, 229–231.
18. Bompaire, F.; Mateus, C.; Taillia, H.; De Greslan, T.; Lahutte, M.; Sallansonnet-Froment, M.; Ouologuem, M.; Renard, J.L.; Gorochoy, G.; Robert, C.; et al., Severe meningo-radiculo-neuritis associated with ipilimumab. *Invest. New Drugs* **2012**, *30*, 2407–2410.
19. Altman, A.L.; Golub, J.S.; Pensak, M.L.; Samy, R.N. Bilateral Facial Palsy following Ipilimumab Infusion for Melanoma. *Otolaryngol. Head Neck Surg.* **2015**, *153*, 894–895.
20. Carl, D.; Grüllich, C.; Hering, S.; Schabet, M. Steroid responsive encephalopathy associated with autoimmune thyroiditis following ipilimumab therapy: A case report. *BMC Res. Notes* **2015**, *8*, 316.
21. Conry, R.M.; Sullivan, J.C.; Nabors, and L.B.3rd. Ipilimumab-induced encephalopathy with a reversible splenic lesion. *Cancer Immunol. Res.* **2015**, *3*, 598–601.



22. Wilson, R.; Menassa, D.A.; Davies, A.J.; Michael, S.; Hester, J.; Kuker, W.; Collins, G.P.; Cossins, J.; Beeson, D.; Steven, N.; et al. Seronegative antibody-mediated neurology after immune checkpoint inhibitors. *Ann. Clin. Transl. Neurol.* **2018**, *5*, 640–645.
23. Strik, H.; Keber, U.; Hammoud, W.A.; Riera-Knorrenschild, J.; Carl, B.; Dodel, R.; Pagenstecher, A.; Neubauer, A. Immune checkpoint inhibitor-associated CNS autoimmune disorder (ICICAD) following nivolumab treatment: A new entity of drug-induced autoimmune encephalitis?. *Eur. J. Cancer* **2017**, *87*, 205–208.
24. Garcia, C.A.; El-Ali, A.; Rath, T.J.; Contis, L.C.; Gorantla, V.; Drappatz, J.; Davar, D. Neurologic immune-related adverse events associated with adjuvant ipilimumab: Report of two cases. *J. Immunother. Cancer* **2018**, *6*, 83.
25. Naito, T.; Osaki, M.; Ubano, M.; Kanzaki, M.; Uesaka, Y. Acute cerebellitis after administration of nivolumab and ipilimumab for small cell lung cancer. *Neurol. Sci.* **2018**, *39*, 1791–1793.
26. Bot, I.; Blank, C.U.; Boogerd, W.; Brandsma, D. Neurological immune-related adverse events of ipilimumab. *Pract. Neurol.* **2013**, *13*, 278–280.
27. Martinot, M.; Ahle, G.; Petrosyan, I.; Martinez, C.; Gorun, D.M.; Mohseni-Zadeh, M.; Fafi-Kremer, S.; Tebacher-Alt, M. Progressive Multifocal Leukoencephalopathy after Treatment with Nivolumab. *Emerg. Infect. Dis.* **2018**, *24*, 1594–1596.
28. Matsuoka, H.; Kimura, H.; Koba, H.; Tambo, Y.; Ohkura, N.; Hara, J.; Sone, T.; Kasahara, K. Nivolumab-induced Limbic Encephalitis with Anti-Hu Antibody in a Patient With Advanced Pleomorphic Carcinoma of the Lung. *Clin. Lung Cancer* **2018**, *19*, e597–e599.
29. Chaucer, B.; Stone, A.; Demanes, A.; Seibert, S.M. Nivolumab-Induced Encephalitis in Hereditary Leiomyomatosis and Renal Cell Cancer Syndrome. *Case Rep. Oncol. Med.* **2018**, *2018*, 4273231, doi:10.1155/2018/4273231.
30. Patel, A.R.; Connors, S.; Wardak, Z.; Brugarolas, J.; Patel, T.R. Inflammatory Reaction Secondary to Immune Checkpoint Inhibitor Therapy Mimicking a Post-Operative Brain Abscess. *World Neurosurg.* **2019**, *129*, 354–358.
31. Quach, H.T.; Robbins, C.J.; Balko, J.M.; Chiu, C.Y.; Miller, S.; Wilson, M.R.; Nelson, G.E.; Johnson, D.B. Severe Epididymo-Orchitis and Encephalitis Complicating Anti-PD-1 Therapy. *Oncologist* **2019**, *24*, 872–876.
32. Zafar, Z.; Vogler, C.; Hudali, T.; Bhattarai, M. Nivolumab-Associated Acute Demyelinating Encephalitis: A Case Report and Literature Review. *Clin. Med. Res.* **2019**, *17*, 29–33.
33. Shah, S.; Dunn-Pirio, A.; Luedke, M.; Morgenlander, J.; Skeen, M.; Eckstein, C. Nivolumab-Induced Autoimmune Encephalitis in Two Patients with Lung Adenocarcinoma. *Case Rep. Neurol. Med.* **2018**, *2018*, 2548528, doi:10.1155/2018/2548528.
34. Shibaki, R.; Murakami, S.; Oki, K.; Ohe, Y. Nivolumab-induced autoimmune encephalitis in an anti-neuronal autoantibody-positive patient. *Jpn. J. Clin. Oncol.* **2019**, *49*, 793–794.
35. De la Hoz, A.; Foolad, F.; Gallegos, C.; Kornblau, S.; Kontoyiannis, D.P. Nivolumab-induced encephalitis post allogeneic stem cell transplant in a patient with Hodgkin's disease. *Bone Marrow Transplant.* **2019**, *54*, 749–751.
36. Kopecký, J.; Kubeček, O.; Geryk, T.; Slováčková, B.; Hoffmann, P.; Žiaran, M.; Priester, P. Nivolumab induced encephalopathy in a man with metastatic renal cell cancer: A case report. *J. Med. Case Rep.* **2018**, *12*, 262.
37. Leitinger, M.; Varosanec, M.V.; Pikija, S.; Wass, R.E.; Bandke, D.; Weis, S.; Studnicka, M.; Grinzinger, S.; McCoy, M.R.; Hauer, L.; et al., Fatal Necrotizing Encephalopathy after Treatment with Nivolumab for Squamous Non-Small Cell Lung Cancer: Case Report and Review of the Literature. *Front. Immunol.* **2018**, *9*, 108.
38. Läubli, H.; Hench, J.; Stanczak, M.; Heijnen, I.; Papachristofilou, A.; Frank, S.; Zippelius, A.; Stenner-Liewen, F. Cerebral vasculitis mimicking intracranial metastatic progression of lung cancer during PD-1 blockade. *J. Immunother. Cancer* **2017**, *5*, 46.
39. Choe, J.H.; Andonian, B.J.; Kim, G.J.; Salama, A.K. Autoimmune meningoencephalitis in a melanoma patient treated with ipilimumab. *Immunotherapy* **2016**, *8*, 1163–1167.
40. Brown, M.P.; Hissaria, P.; Hsieh, A.H.; Kneebone, C.; Vallat, W. Autoimmune limbic encephalitis with anti-contactin-associated protein-like 2 antibody secondary to pembrolizumab therapy. *J. Neuroimmunol.* **2017**, *305*, 16–18.

41. Niki, M.; Nakaya, A.; Kurata, T.; Nakahama, K.; Yoshioka, H.; Kaneda, T.; Kibata, K.; Ogata, M.; Nomura, S. Pembrolizumab-induced autoimmune encephalitis in a patient with advanced non-small cell lung cancer: A case report. *Mol. Clin. Oncol.* **2019**, *10*, 267–269.
42. Johnson, D.B.; Saranga-Perry, V.; Lavin, P.J.; Burnette, W.B.; Clark, S.W.; Uskavitch, D.R.; Wallace, D.E.; Dickson, M.A.; Kudchadkar, R.R.; Sosman, J.A. Myasthenia Gravis Induced by Ipilimumab in Patients With Metastatic Melanoma. *J. Clin Oncol* **2015**, *33*, e122–e124.
43. Sciacca, G.; Nicoletti, A.; Rampello, L.; Noto, L.; Parra, H.J.S.; Zappia, M. Benign form of myasthenia gravis after nivolumab treatment. *Muscle Nerve* **2016**, *54*, 507–509.
44. Shirai, T.; Sano, T.; Kamijo, F.; Saito, N.; Miyake, T.; Kodaira, M.; Katoh, N.; Nishie, K.; Okuyama, R.; Uhara, H. Acetylcholine receptor binding antibody-associated myasthenia gravis and rhabdomyolysis induced by nivolumab in a patient with melanoma. *Jpn. J. Clin. Oncol.* **2016**, *46*, 86–88.
45. Polat, P.; Donofrio, P.D. Myasthenia gravis induced by nivolumab therapy in a patient with non-small-cell lung cancer. *Muscle Nerve* **2016**, *54*, 507.
46. Chang, E.; Sabichi, A.L.; Sada, Y.H. Myasthenia Gravis After Nivolumab Therapy for Squamous Cell Carcinoma of the Bladder. *J. Immunother.* **2017**, *40*, 114–116.
47. Earl, D.E.; Loochtan, A.I.; Bedlack, R.S. Refractory myasthenia gravis exacerbation triggered By pembrolizumab. *Muscle Nerve* **2018**, *57*, E120–E121.
48. Derle, E.; Benli, S. Ipilimumab treatment associated with myasthenic crises and unfavorable disease course. *Neurol. Sci.* **2018**, *39*, 1773–1774.
49. Montes, V.; Sousa, S.; Pita, F.; Guerreiro, R.; Carmona, C. Myasthenia Gravis Induced by Ipilimumab in a Patient With Metastatic Melanoma. *Front. Neurol.* **2018**, *9*, 150.
50. Lau, K.H.V.; Kumar, A.; Yang, I.H.; Nowak, R.J. Exacerbation of myasthenia gravis in a patient with melanoma treated with pembrolizumab. *Muscle Nerve* **2016**, *54*, 157–161.
51. Nguyen, B.H.; Kuo, J.; Budiman, A.; Christie, H.; Ali, S. Two cases of clinical myasthenia gravis associated with pembrolizumab use in responding melanoma patients. *Melanoma Res.* **2017**, *27*, 152–154.
52. Alnahhas, I.; Wong, J. A case of new-onset antibody-positive myasthenia gravis in a patient treated with pembrolizumab for melanoma. *Muscle Nerve* **2017**, *55*, E25–E26.
53. Zhu, J.; Li, Y. Myasthenia gravis exacerbation associated with pembrolizumab. *Muscle Nerve* **2016**, *54*, 506–507.
54. Gonzalez, N.L.; Puwanant, A.; Lu, A.; Marks, S.M.; Živković, S.A. Myasthenia triggered by immune checkpoint inhibitors: New case and literature review. *Neuromuscul. Disord.* **2017**, *27*, 266–268.
55. Cooper, D.S.; Meriggioli, M.N.; Bonomi, P.D.; Malik, R. Severe Exacerbation of Myasthenia Gravis Associated with Checkpoint Inhibitor Immunotherapy. *J. Neuromuscul. Dis.* **2017**, *4*, 169–173.
56. Mehta, J.J.; Maloney, E.; Srinivasan, S.; Seitz, P.; Cannon, M. Myasthenia Gravis Induced by Nivolumab: A Case Report. *Cureus* **2017**, *9*, e1702.
57. Becquart, O.; Lacotte, J.; Malissart, P.; Nadal, J.; Lesage, C.; Guillot, B.; Du Thanh, A.; Julie, L.; Pauline, M.; Jeremy, N.; et al. Myasthenia Gravis Induced by Immune Checkpoint Inhibitors. *J. Immunother.* **2019**, *42*, 309–312.
58. Lara, M.S.; Afify, A.; Ellis, M.P.; Phan, C.T.; Richman, D.P.; Riess, J.W. Immune Checkpoint Inhibitor-Induced Myasthenia Gravis in a Patient with Advanced NSCLC and Remote History of Thymoma. *Clin. Lung Cancer* **2019**, *20*, e489–e491.
59. Werner, J.-M.; Schweinsberg, V.; Schroeter, M.; Von Reutern, B.; Malter, M.P.; Schlaak, M.; Fink, G.R.; Mauch, C.; Galldiks, N. Successful Treatment of Myasthenia Gravis Following PD-1/CTLA-4 Combination Checkpoint Blockade in a Patient With Metastatic Melanoma. *Front. Oncol.* **2019**, *9*, 84.
60. Nakatani, Y.; Tanaka, N.; Enami, T.; Minami, S.; Okazaki, T.; Komuta, K. Lambert-Eaton Myasthenic Syndrome Caused by Nivolumab in a Patient with Squamous Cell Lung Cancer. *Case Rep. Neurol.* **2018**, *10*, 346–352.
61. Kimura, T.; Fukushima, S.; Miyashita, A.; Aoi, J.; Jinnin, M.; Kosaka, T.; Ando, Y.; Matsukawa, M.; Inoue, H.; Kiyotani, K.; et al. Myasthenic crisis and polymyositis induced by one dose of nivolumab. *Cancer Sci.* **2016**, *107*, 1055–1058.
62. March, K.L.; Samarin, M.J.; Sodhi, A.; Owens, R.E. Pembrolizumab-induced myasthenia gravis: A fatal case report. *J. Oncol. Pharm. Pract.* **2018**, *24*, 146–149.

63. Chen, J.H.; Lee, K.Y.; Hu, C.J.; Chung, C.C. Coexisting myasthenia gravis, myositis, and polyneuropathy induced by ipilimumab and nivolumab in a patient with non-small-cell lung cancer: A case report and literature review. *Medicine (Baltimore)* **2017**, *96*, e9262.
64. Liao, B.; Shroff, S.; Kamiya-Matsuoka, C.; Tummala, S. Atypical neurological complications of ipilimumab therapy in patients with metastatic melanoma. *Neuro. Oncol.* **2014**, *16*, 589–593.
65. Tan, R.Y.C.; Toh, C.K.; Takano, A. Continued Response to One Dose of Nivolumab Complicated by Myasthenic Crisis and Myositis. *J. Thorac. Oncol.* **2017**, *12*, e90–e91.
66. Huh, S.Y.; Shin, S.H.; Kim, M.K.; Lee, S.Y.; Son, K.H.; Shin, H.Y. Emergence of Myasthenia Gravis with Myositis in a Patient Treated with Pembrolizumab for Thymic Cancer. *J. Clin. Neurol.* **2018**, *14*, 115–117.
67. Konoeda, F.; Suzuki, S.; Nishimoto, Y.; Hoshino, H.; Takagi, M. A case of myasthenia gravis and myositis induced by nivolumab. *Rinsho Shinkeigaku* **2017**, *57*, 373–377.
68. Kang, K.H.; Grubb, W.; Sawlani, K.; Gibson, M.K.; Hoimes, C.J.; Rogers, L.R.; Lavertu, P.; Yao, M. Immune checkpoint-mediated myositis and myasthenia gravis: A case report and review of evaluation and management. *Am. J. Otolaryngol.* **2018**, *39*, 642–645.
69. So, H.; Ikeguchi, R.; Kobayashi, M.; Suzuki, M.; Shimizu, Y.; Kitagawa, K. PD-1 inhibitor-associated severe myasthenia gravis with necrotizing myopathy and myocarditis. *J. Neurol. Sci.* **2019**, *399*, 97–100.
70. Moslehi, J.J.; Johnson, D.B.; Sosman, J. A.; Caio, G. Myocarditis with Immune Checkpoint Blockade. *New Engl. J. Med.* **2017**, *376*, 292.
71. Bourgeois-Vionnet, J.; Joubert, B.; Bernard, E.; Sia, M.A.; Pante, V.; Fabien, N.; Honnorat, J.; Streichenberger, N. Nivolumab-induced myositis: A case report and a literature review. *J. Neurol. Sci.* **2018**, *387*, 51–53.
72. Fox, E.; Dabrow, M.; Ochsner, G. A Case of Nivolumab-Induced Myositis. *Oncologist* **2016**, *21*, e3.
73. Saini, L.; Chua, N. Severe inflammatory myositis in a patient receiving concurrent nivolumab and azacitidine. *Leuk. Lymphoma* **2017**, *58*, 2011–2013.
74. Badovinac, S.; Korsic, M.; Zarković, K.; Muršić, D.; Roglic, M.; Jakopovic, M.; Samarzija, M. Nivolumab-induced synchronous occurrence of myositis and hypothyroidism in a patient with squamous cell lung cancer. *Immunotherapy* **2018**, *10*, 427–431.
75. Pushkarevskaya, A.; Neuberger, U.; Dimitrakopoulou-Strauss, A.; Enk, A.; Hassel, J.C. Severe Ocular Myositis After Ipilimumab Treatment for Melanoma: A Report of 2 Cases. *J. Immunother.* **2017**, *40*, 282–285.
76. Lecouflet, M.; Verschoore, M.; Giard, C.; Gohier, P.; Le Corre, Y.; Milea, D.; Martin, L. Orbital myositis associated with ipilimumab. *Ann. Dermatol. Venereol.* **2013**, *140*, 448–451.
77. Sheik Ali, S.; Goddard, A.L.; Luke, J.J.; Donahue, H.; Todd, D.J.; Werchniak, A.; Vleugels, R.A. Drug-associated dermatomyositis following ipilimumab therapy: A novel immune-mediated adverse event associated with cytotoxic T-lymphocyte antigen 4 blockade. *JAMA Dermatol.* **2015**, *151*, 195–199.
78. Yoshioka, M.; Kambe, N.; Yamamoto, Y.; Suehiro, K.; Matsue, H. Case of respiratory discomfort due to myositis after administration of nivolumab. *J. Dermatol.* **2015**, *42*, 1008–1009.
79. Vallet, H.; Gaillet, A.; Weiss, N.; Vanhaecke, C.; Saheb, S.; Touitou, V.; Franck, N.; Kramkimel, N.; Borden, A.; Touat, M.; et al. Pembrolizumab-induced necrotic myositis in a patient with metastatic melanoma. *Ann. Oncol.* **2016**, *27*, 1352–1353.
80. Haddox, C.L.; Shenoy, N.; Shah, K.K.; Kao, J.C.; Jain, S.; Halfdanarson, T.R.; Wijdicks, E.F.; Goetz, M.P. Pembrolizumab induced bulbar myopathy and respiratory failure with necrotizing myositis of the diaphragm. *Ann. Oncol.* **2017**, *28*, 673–675.
81. Bilen, M.A.; Subudhi, S.K.; Gao, J.; Tannir, N.M.; Tu, S.-M.; Sharma, P. Acute rhabdomyolysis with severe polymyositis following ipilimumab-nivolumab treatment in a cancer patient with elevated anti-striated muscle antibody. *J. Immunother. Cancer* **2016**, *4*, 36.
82. Gandiga, P.C.; Wang, A.R.; Gonzalez-Rivera, T.; Sreih, A.G. Pembrolizumab-associated inflammatory myopathy. *Rheumatology (Oxford)* **2018**, *57*, 397–398.
83. Diamantopoulos, P.T.; Tsatsou, K.; Benopoulou, O.; Anastasopoulou, A.; Gogas, H. Inflammatory Myopathy and Axonal Neuropathy in a Patient With Melanoma Following Pembrolizumab Treatment. *J. Immunother.* **2017**, *40*, 221–223.
84. Min, L.; Hodi, F.S. Anti-PD1 following ipilimumab for mucosal melanoma: Durable tumor response associated with severe hypothyroidism and rhabdomyolysis. *Cancer Immunol. Res.* **2014**, *2*, 15–18.

85. Carrera, W.; Baartman, B.J.; Kosmorsky, G. A Case Report of Drug-Induced Myopathy Involving Extraocular Muscles after Combination Therapy with Tremelimumab and Durvalumab for Non-Small Cell Lung Cancer. *Neuroophthalmology* **2017**, *41*, 140–143.
86. Kadota, H.; Gono, T.; Shirai, Y.; Okazaki, Y.; Takeno, M.; Kuwana, M. Immune Checkpoint Inhibitor-Induced Myositis: A Case Report and Literature Review. *Curr. Rheumatol. Rep.* **2019**, *21*, 10.
87. Ogawa, T.; Ishitsuka, Y.; Koguchi-Yoshioka, H.; Tanaka, R.; Fujisawa, Y.; Ishii, A.; Tamaoka, A.; Fujimoto, M. Polymyositis induced by PD-1 blockade in a patient in hepatitis B remission. *J. Neurol. Sci.* **2017**, *381*, 22–24.
88. Sekiguchi, K.; Hashimoto, R.; Noda, Y.; Tachibana, H.; Otsuka, Y.; Chihara, N.; Shiraiishi, Y.; Inoue, T.; Ueda, T. Diaphragm involvement in immune checkpoint inhibitor-related myositis. *Muscle Nerve* **2019**, *60*.
89. Ong, S.; Chapman, J.; Young, G.; Mansy, T. Guillain-Barré-like syndrome during pembrolizumab treatment. *Muscle Nerve* **2018**, *58*, E8–E10.
90. De Maleissye, M.-F.; Saiag, P.; Nicolas, G. Pembrolizumab-Induced Demyelinating Polyradiculoneuropathy. *N. Engl. J. Med.* **2016**, *375*, 296–297.
91. Schneiderbauer, R.; Schneiderbauer, M.; Wick, W.; Enk, A.; Haenssle, H.; Hassel, J. PD-1 Antibody-induced Guillain-Barré Syndrome in a Patient with Metastatic Melanoma. *Acta Derm. Venereol.* **2017**, *97*, 395–396.
92. Fukumoto, Y.; Kuwahara, M.; Kawai, S.; Nakahama, K.; Kusunoki, S. Acute demyelinating polyneuropathy induced by nivolumab. *J. Neurol. Neurosurg. Psychiatry* **2018**, *89*, 435–437.
93. Supakornnumporn, S.; Katirji, B. Guillain-Barre Syndrome Triggered by Immune Checkpoint Inhibitors: A Case Report and Literature Review. *J. Clin. Neuromuscul. Dis.* **2017**, *19*, 80–83.
94. Yost, M.D.; Chou, C.Z.; Botha, H.; Block, M.S.; Liewluck, T. Facial diplegia after pembrolizumab treatment. *Muscle Nerve* **2017**, *56*, E20–E21.
95. Jacob, A.; Unnikrishnan, D.C.; Mathew, A.; Thyagarajan, B.; Patel, S. A case of fatal Guillain-Barre syndrome from anti-PD1 monoclonal antibody use. *J. Cancer Res. Clin. Oncol.* **2016**, *142*, 1869–1870.
96. Wilgenhof, S.; Neyns, B. Anti-CTLA-4 antibody-induced Guillain-Barre syndrome in a melanoma patient. *Ann. Oncol.* **2011**, *22*, 991–993.
97. Kelly Wu, W.; Broman, K.K.; Brownie, E.R.; Kauffmann, R.M. Ipilimumab-induced Guillain-Barré Syndrome Presenting as Dysautonomia: An Unusual Presentation of a Rare Complication of Immunotherapy. *J. Immunother.* **2017**, *40*, 196–199.
98. Gu, Y.; Menzies, A.M.; Long, G.V.; Fernando, S.; Herkes, G. Immune mediated neuropathy following checkpoint immunotherapy. *J. Clin. Neurosci.* **2017**, *45*, 14–17.
99. Nukui, T.; Nakayama, Y.; Yamamoto, M.; Taguchi, Y.; Dougu, N.; Konishi, H.; Hayashi, T.; Nakatsuji, Y. Nivolumab-induced acute demyelinating polyradiculoneuropathy mimicking Guillain-Barré syndrome. *J. Neurol. Sci.* **2018**, *390*, 115–116.
100. Thaipisuttikul, I.; Chapman, P.; Avila, E.K. Peripheral neuropathy associated with ipilimumab: A report of 2 cases. *J. Immunother.* **2015**, *38*, 77–79.
101. Tanaka, R.; Maruyama, H.; Tomidokoro, Y.; Yanagihara, K.; Hirabayashi, T.; Ishii, A.; Okune, M.; Inoue, S.; Sekine, I.; Tamaoka, A.; et al. Nivolumab-induced chronic inflammatory demyelinating polyradiculoneuropathy mimicking rapid-onset Guillain-Barré syndrome: A case report. *Jpn. J. Clin. Oncol.* **2016**, *46*, 875–878.
102. Sepúlveda, M.; Martínez-Hernández, E.; Gaba, L.; Victoria, I.; Sola-Valls, N.; Falgàs, N.; Casanova-Molla, J.; Graus, F.; Martínez-Hernández, E.; Sola-Valls, N.; et al. Motor polyradiculopathy during pembrolizumab treatment of metastatic melanoma. *Muscle Nerve* **2017**, *56*, E162–E167.
103. Aya, F.; Ruiz-Esquide, V.; Viladot, M.; Font, C.; Prieto-González, S.; Prat, A.; Arance, A. Vasculitic neuropathy induced by pembrolizumab. *Ann. Oncol.* **2017**, *28*, 433–434.
104. Manam, R.; Martin, J.L.; Gross, J.A.; Chaudhary, D.; Chowdhary, S.; Espinosa, P.S.; Santos, E.S. Case Reports of Pembrolizumab-induced Acute Inflammatory Demyelinating Polyneuropathy. *Cureus* **2018**, *10*, e3371.
105. Simsek, M.; Bilici, M.; Tekin, S.B. Creatinine kinase elevation and peripheral neuropathy during nivolumab treatment of a patient with metastatic renal cell carcinoma. *Indian J. Cancer* **2018**, *55*, 413.
106. Sakai, K.; Mochizuki, H.; Mochida, K.; Shiomi, K.; Amano, M.; Nakazato, M. A Case of Nivolumab-Induced Severe Mononeuropathy Multiplex and Rhabdomyolysis. *Case Rep. Med.* **2017**, *2017*, 1–4.

107. Zecchini, J.M., Kim, S.; Yum, K.; Friedlander, P. Development of Bell's Palsy After Treatment With Ipilimumab and Nivolumab for Metastatic Melanoma: A Case Report. *J. Immunother.* **2018**, *41*, 39–41.
108. Ziemann, D.; Frankel, A.E. Autoimmune Bell's Palsy Following Immunotherapy For Metastatic Melanoma: A Report of 2 Cases. *J. Immunother.* **2019**, *42*, 318–320.
109. Jinnur, P.; Lim, K.G. Severe Acute Orthopnea: Ipilimumab-Induced Bilateral Phrenic Nerve Neuropathy. *Lung* **2015**, *193*, 611–613.
110. Ghosn, J.; Vicino, A.; Michielin, O.; Coukos, G.; Kuntzer, T.; Obeid, M. A severe case of neuro-Sjögren's syndrome induced by pembrolizumab. *J. Immunother. Cancer* **2018**, *6*, 110.
